# Supplementary material for: Effect of suberoylanilide hydroxamic acid (SAHA) on breast cancer cells within a tumor–stroma microfluidic model
Source: Royal Society of Chemistry journal article supplement (doi:10.1039/c7ib00180k), 2017-11-14
Supplement: c7ib00180k1.pdf [file c7ib00180k1.pdf]

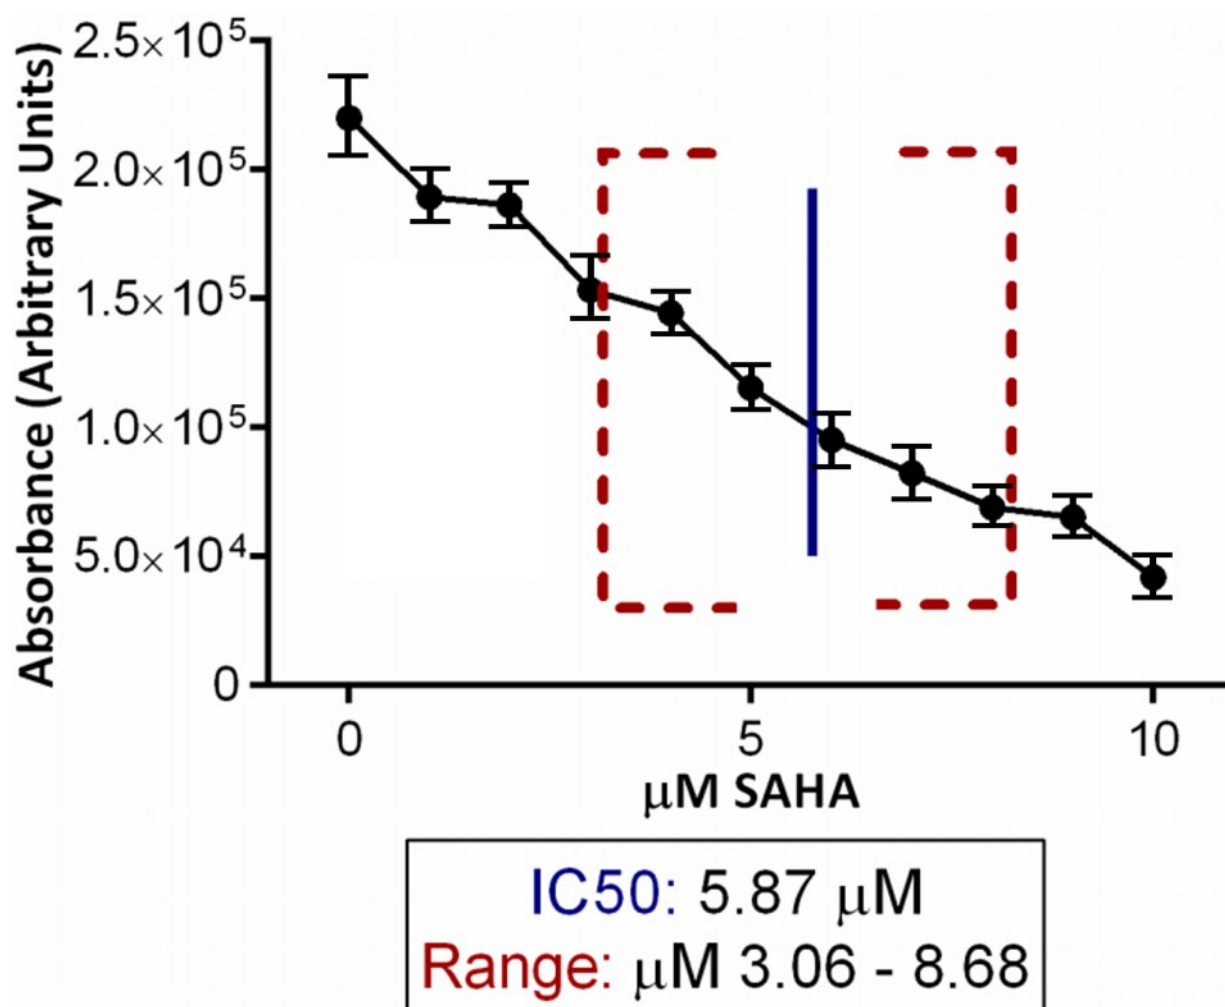

**Supplementary Figure S1:** Metabolic activity assay (alamarBlue®) of SUM159 cells in response to SAHA treatment revealed an  $\text{IC}_{50}$  range of 3.06-8.68 $\mu\text{M}$  and a median  $\text{IC}_{50}$  of 5.87 $\mu\text{M}$ .
